# Supplementary material for: Evaluation of dense collagen matrices as medicated wound dressing for the treatment of cutaneous chronic wounds
Source: Royal Society of Chemistry journal article supplement (doi:10.1039/c4bm00370e), 2014-12-16
Supplement: c4bm00370e4.pdf [file c4bm00370e4.pdf]

**CM40** **Collagen  
Sponge**

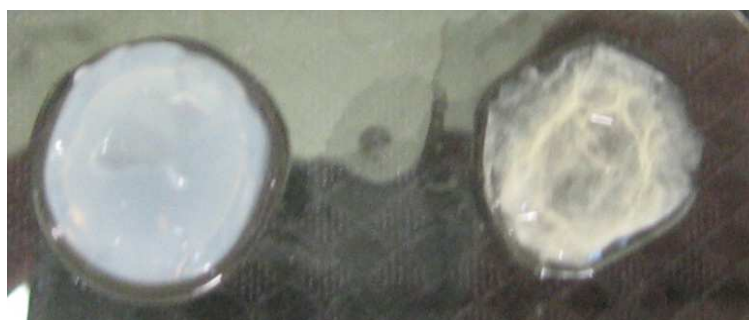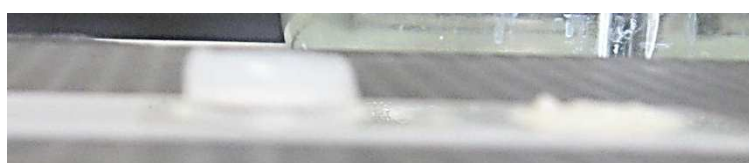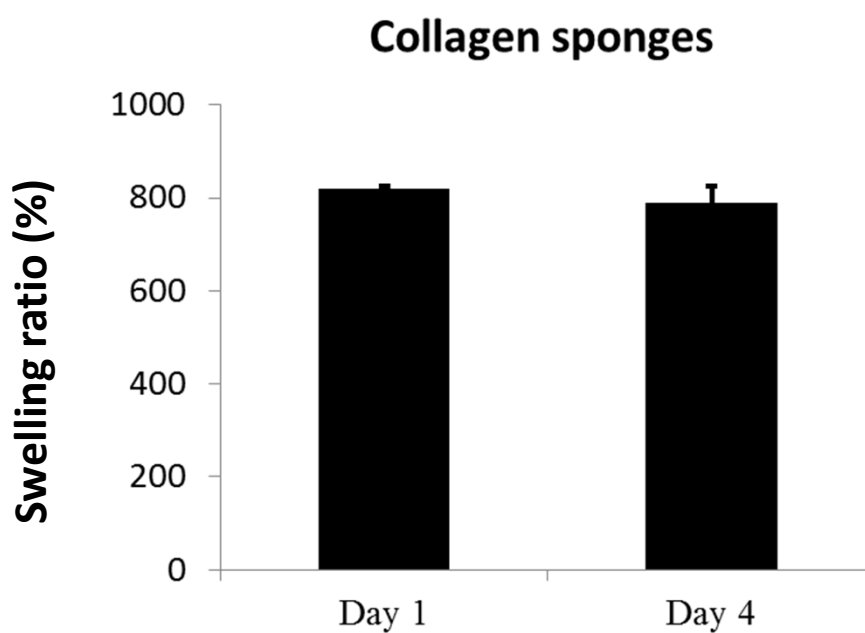

**Supporting Information N°4:** Swelling properties of no cross-linked collagen sponges concentrated at 5 mg.mL<sup>-1</sup>.
