# Supplementary figures and images for: Evaluation of dense collagen matrices as medicated wound dressing for the treatment of cutaneous chronic wounds
Source: Royal Society of Chemistry journal article supplement (doi:10.1039/c4bm00370e), 2014-12-16

## Supporting Information N°7

500 ng/mL 250 ng/mL 125 ng/mL 62 ng/mL 31 ng/mL C

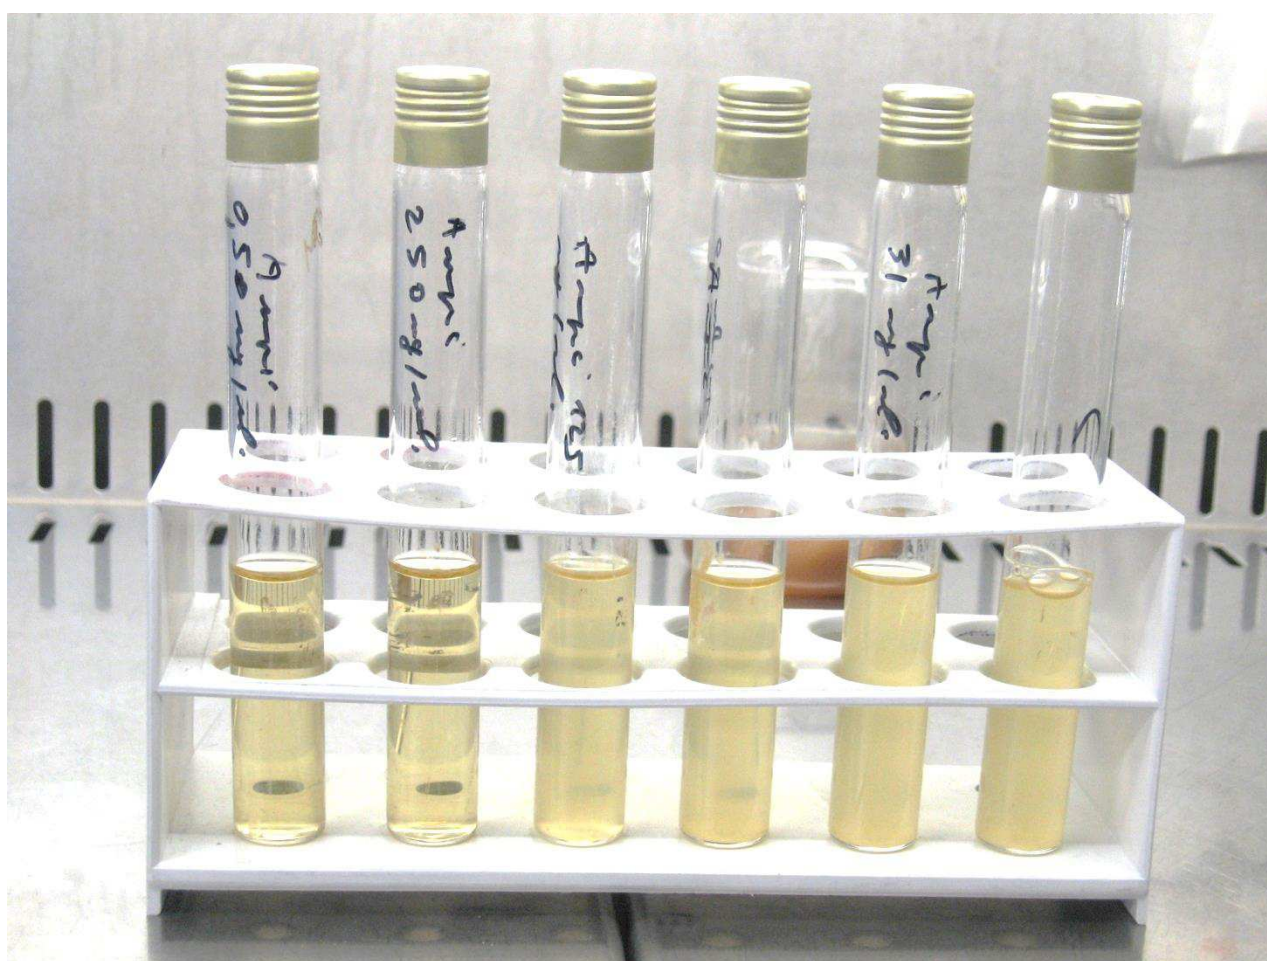

↑  
MIC

Supplement: c4bm00370e6.pdf [file c4bm00370e6.pdf]
